# Supplementary material for: Genome-wide DNA methylation changes in human spermatogenesis
Source: PubMed Central journal article supplement (PMC11179423; doi:10.1016/j.ajhg.2024.04.017), 2024-05-16
Supplement: mmc1.pdf [file mmc1.pdf]

**The American Journal of Human Genetics, Volume 111**

**Supplemental information**

**Genome-wide DNA methylation changes  
in human spermatogenesis**

**Lara M. Siebert-Kuss, Verena Dietrich, Sara Di Persio, Jahnavi Bhaskaran, Martin Stehling, Jann-Frederik Cremers, Sarah Sandmann, Julian Varghese, Sabine Kliesch, Stefan Schlatt, Juan M. Vaquerizas, Nina Neuhaus, and Sandra Laurentino**

## Supplemental information

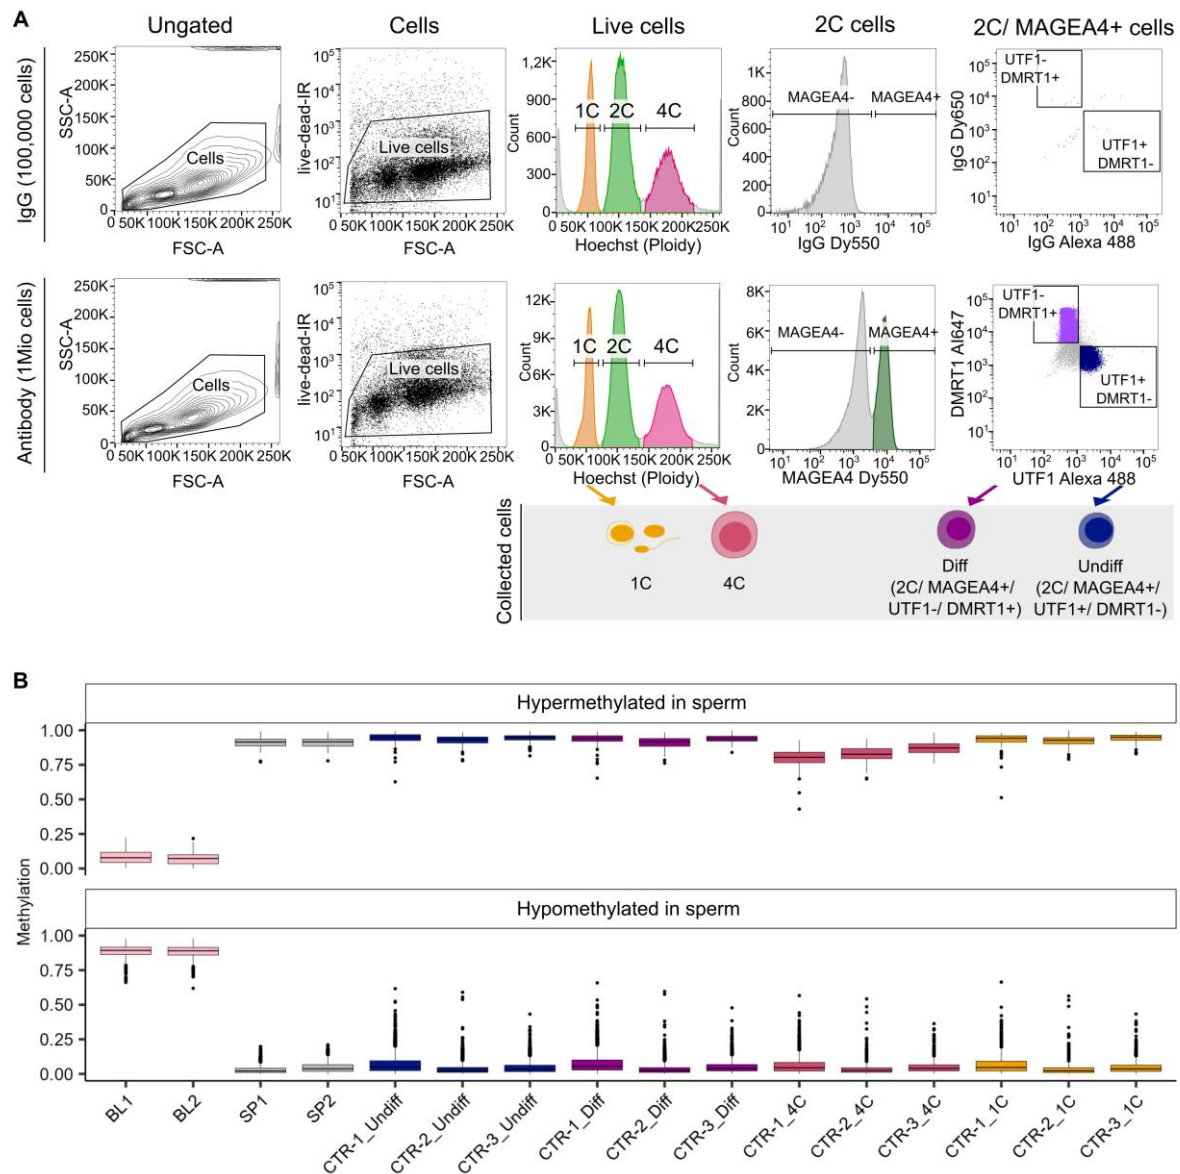

**Figure S1: Sorting strategy and quality check of sorted cells.** **A** Sorting strategy for the different germ cell types represented by 100,000 cells in the IgG and 1 million (Mio) cells in the antibody-stained cells. IgG control showed no positive signal for MAGEA4 within the 2C cells and no signal for UTF1 and DMRT1 within the 2C/MAGEA4+ cells. **B** Box plots display methylation of sperm and blood<sup>60</sup> and each control (CTR) sample in 2,761 sperm-soma DMRs of which 121 are hypermethylated and 2,640 are hypomethylated in sperm. Data are represented as median (center line), upper/lower quartiles (box

limits), 1.5 x interquartile range (whiskers). Undiff = undifferentiated spermatogonia, Diff = differentiating spermatogonia, 4C = primary spermatocytes, 1C = spermatids/sperm.

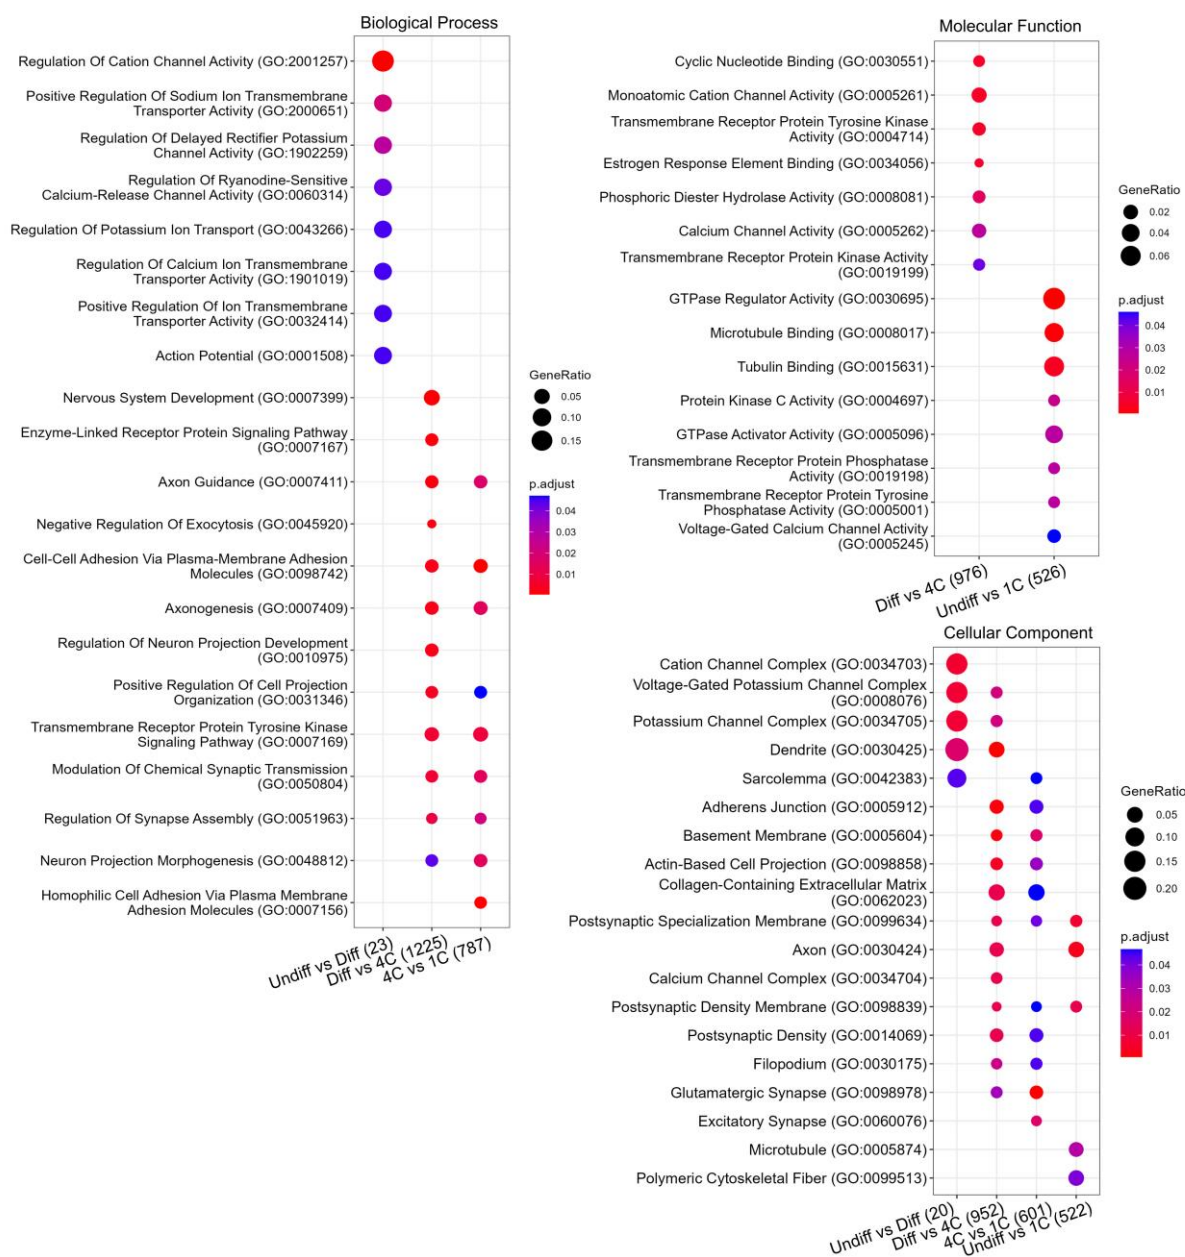

**Figure S2: GO term enrichment analysis of biological processes, molecular function and cellular components of the control (CTR) differentially methylated regions (DMRs).** All DMR group comparisons were assessed and significant results of the top 8 terms with the lowest p-values are displayed. P-values were adjusted for multiple testing with Benjamini-Hochberg correction. Undiff =

undifferentiated spermatogonia, Diff = differentiating spermatogonia, 4C = primary spermatocytes, 1C = spermatids/sperm.

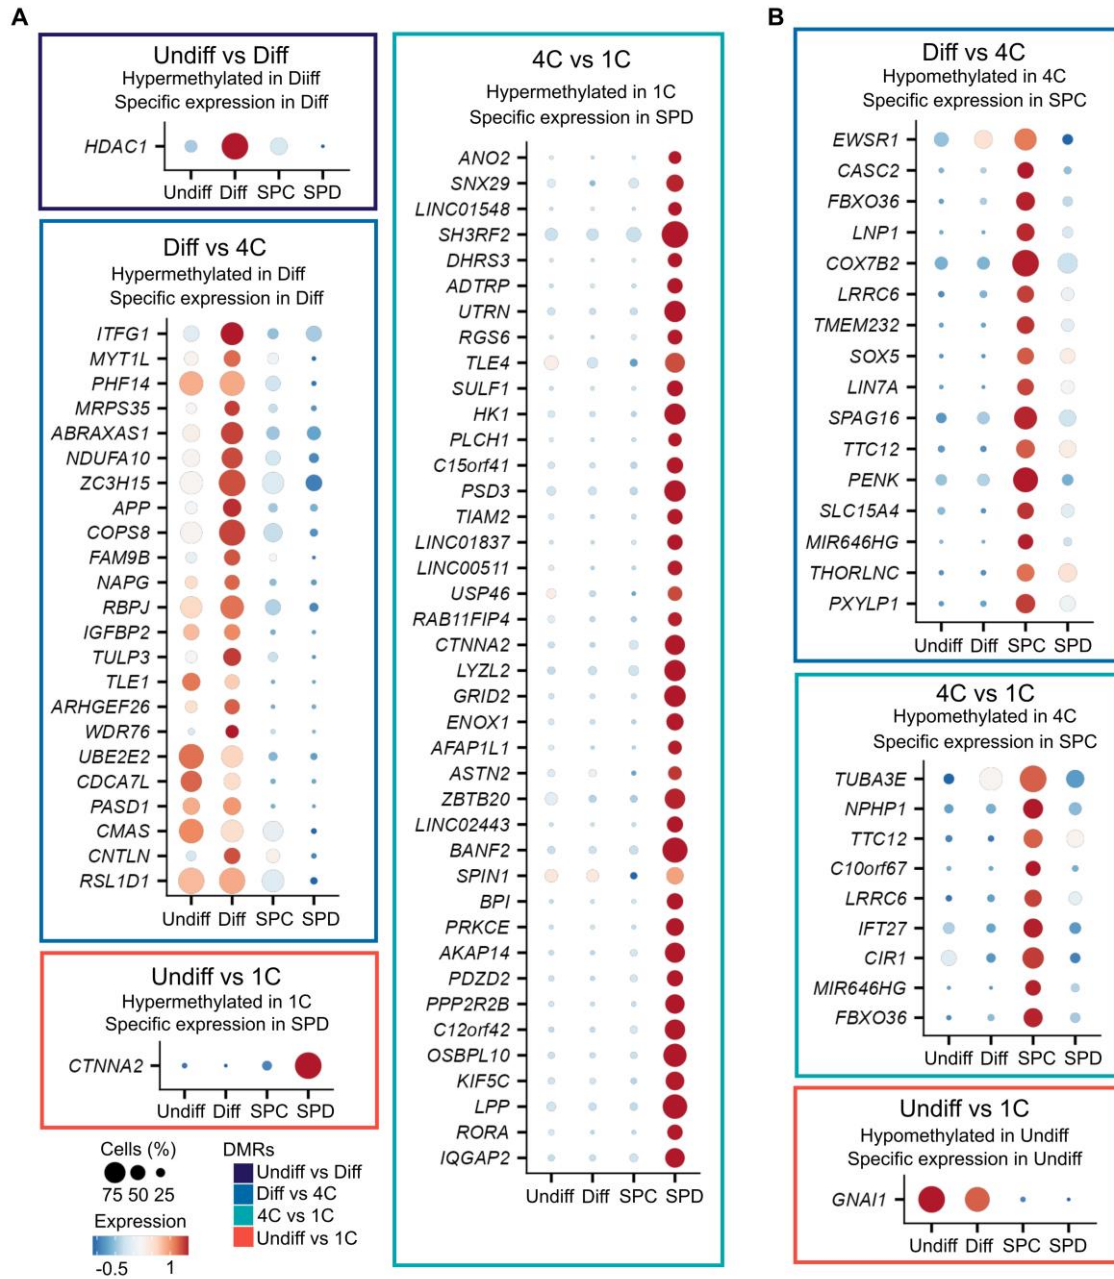

**Figure S3: Differentially methylated region (DMR)-associated genes with germ cell type-specific expression. A** Hypermethylated and **B** hypomethylated DMR-associated genes of the different group comparisons with specific expression in the respective germ cell types<sup>16</sup> are depicted in dot plots. Undiff = undifferentiated spermatogonia, Diff = differentiating spermatogonia, 4C = primary spermatocytes, 1C = spermatids/sperm, SPC = spermatocytes, SPD = spermatids.

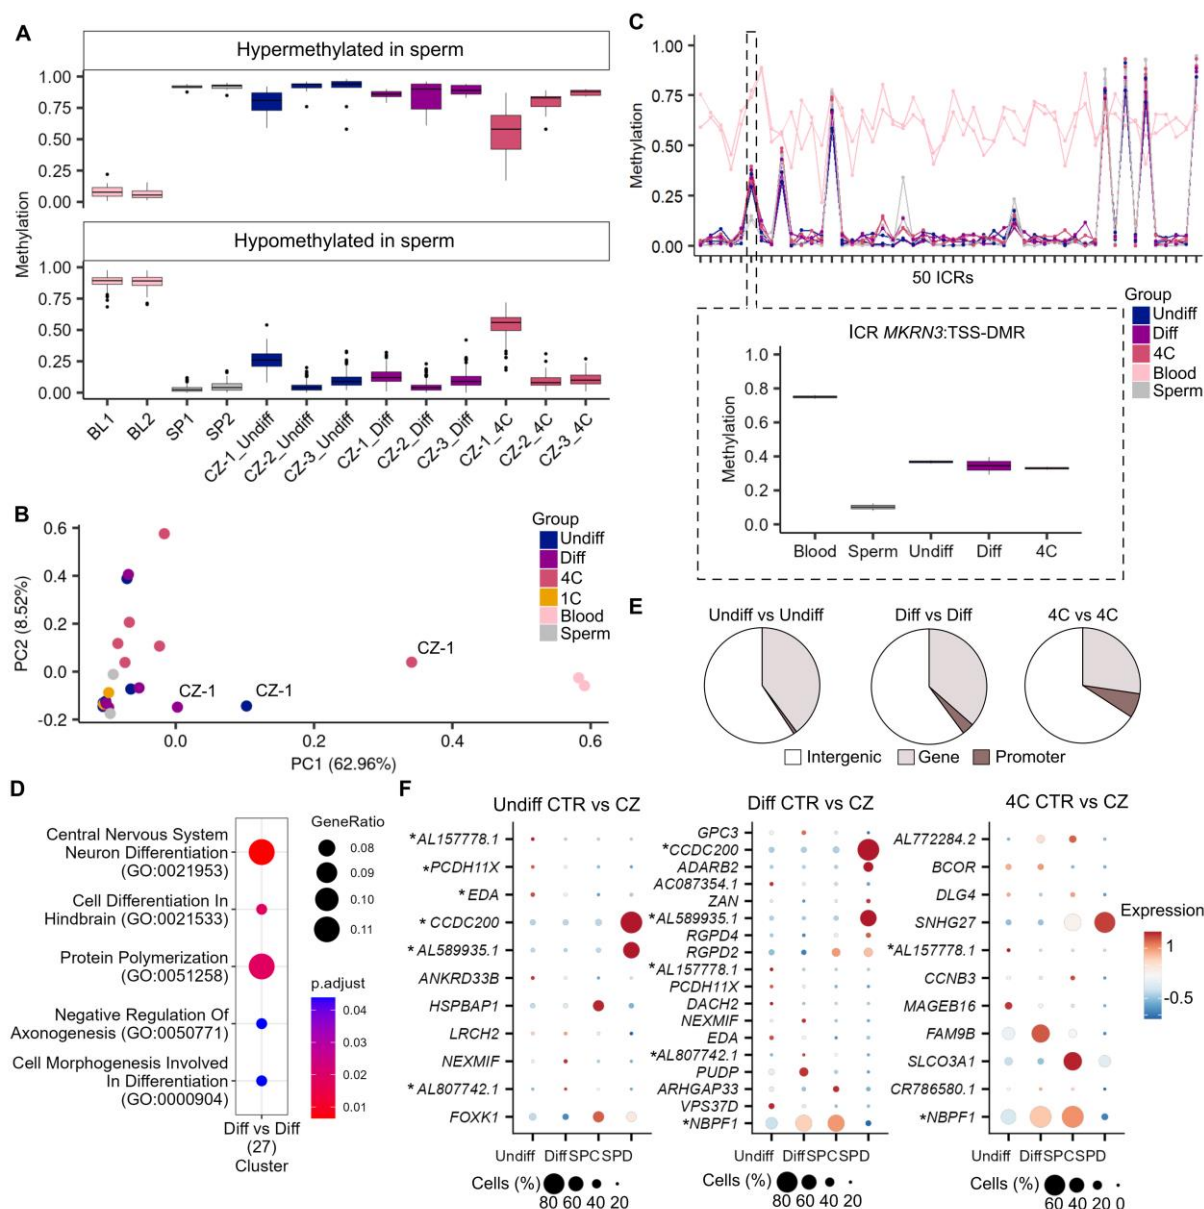

**Figure S4: Purity check of the cryptozoospermic samples and features of control (CTR)/cryptozoospermic (CZ) differentially methylated region (DMR)-associated genes. A** Box plots display methylation of sperm and blood<sup>60</sup> and each CZ sample in 2,761 sperm-soma DMRs. **B** Principal component analysis (PCA) of 2,521 CpGs of the imprinting control regions (ICRs) depicts clustering of all CTR samples and CZ-2 and CZ-3 samples together with sperm, whereas CZ-1 clustered towards blood, explaining 62.96% of variance (PC1). **C** Lineplots show the mean methylation in the 50 ICRs (Table S8) for CZ-2 and CZ-3 in undifferentiated spermatogonia, differentiating spermatogonia, and primary spermatocytes compared to blood and sperm samples<sup>60</sup>. Box plots display the methylation of

MKRN3:TSS-DMR in the respective cell types. Data are represented as median (center line), upper/lower quartiles (box limits), 1.5 x interquartile range (whiskers). **D** Piecharts show the annotation of the CTR/CZ DMRs for genes, promoters and intergenic regions. **E** GO term enrichment analysis for biological processes in the CTR/CZ DMRs. The top 5 results are shown. **F** Dot plots showing DMR-associated genes with germ cell-type specific expression<sup>16</sup>. Genes marked with asterisks are present in more than one group. Undiff = undifferentiated spermatogonia, Diff = differentiating spermatogonia, 4C = primary spermatocytes, SPC = spermatocytes, SPD = spermatids. Panel A assembled with BioRender.com.

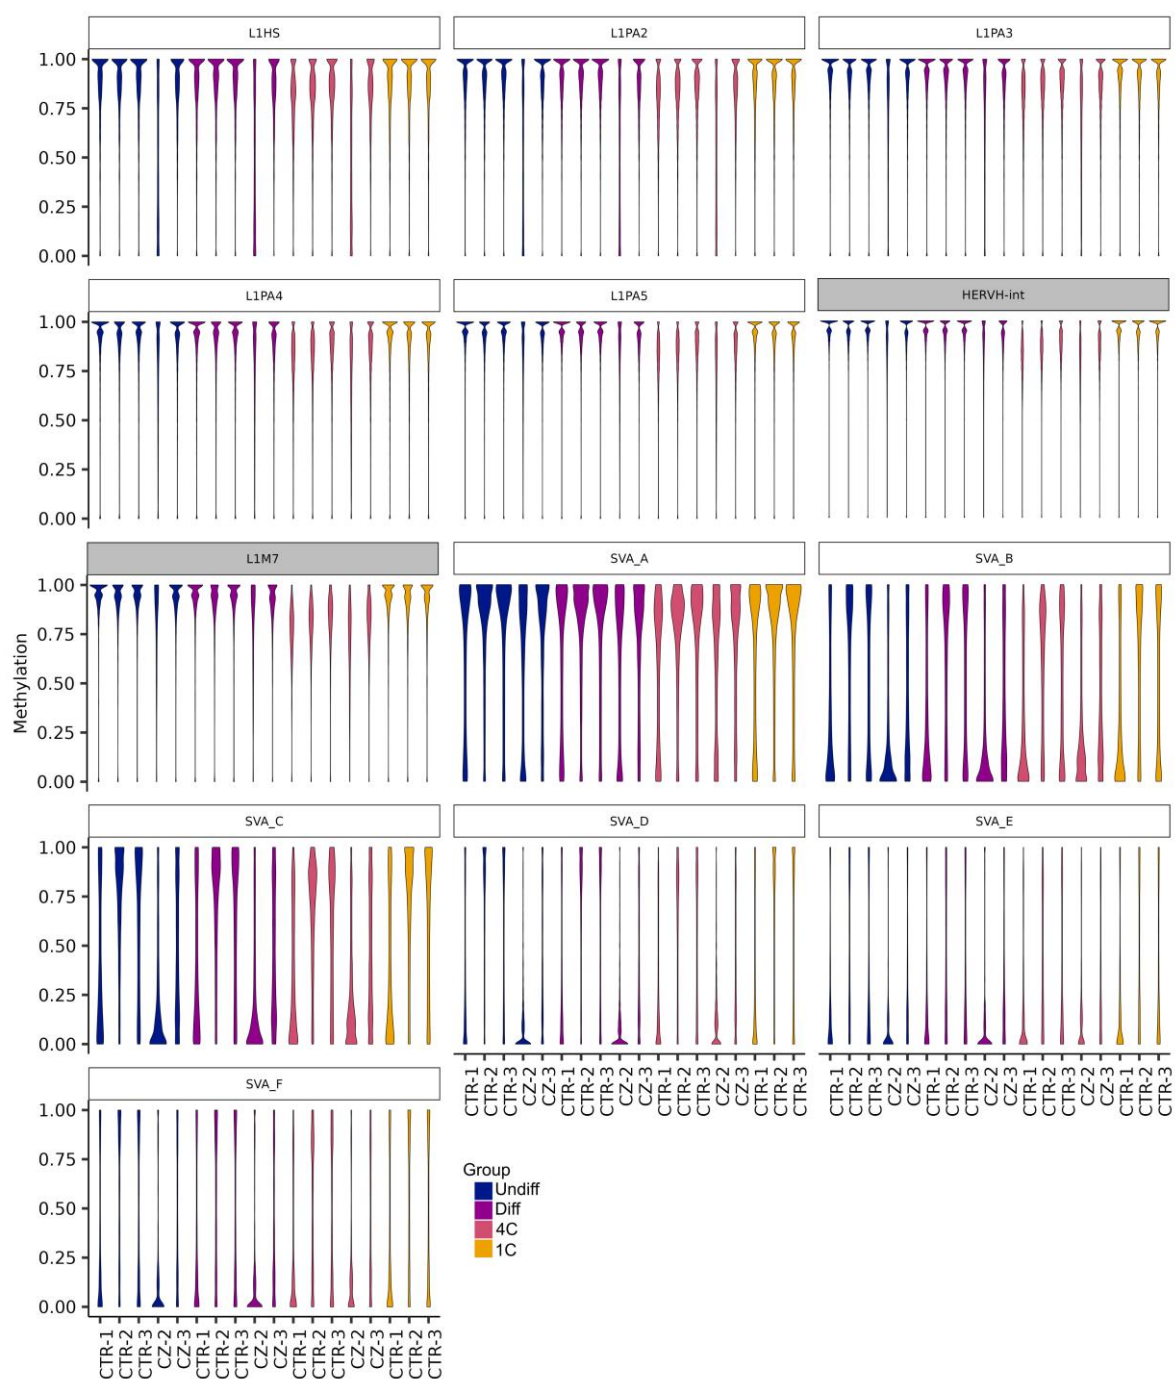

**Figure S5: DNA methylation levels of transposable elements (TEs) per control (CTR) and cryptozoospermic (CZ) samples.** Violin plots showing the CpG methylation of evolutionarily younger (white boxes: L1Hs, L1PA2-5, and SVA A/B/C/D/E/F) and older (grey boxes: HERVH-int and L1M7) TEs

per CTR and CZ samples. Undiff = undifferentiated spermatogonia, Diff = differentiating spermatogonia, 4C = primary spermatocytes, 1C = spermatids/sperm.

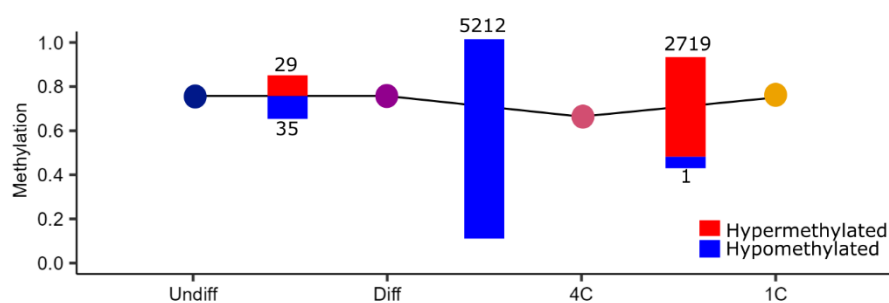

**Figure S6: Schematic summary of DNA methylation changes throughout normal spermatogenesis identified in this study.** Mean global methylation levels are indicated by dots. Number of hyper- or hypomethylated differentially methylated regions (DMRs), compared to the more advanced germ cell type, are depicted as bars and color-coded red and blue, respectively. Undiff = undifferentiated spermatogonia, Diff = differentiating spermatogonia, 4C = primary spermatocytes, 1C = spermatids/sperm.
